# Supplementary material for: Passive cancer targeting with a viral nanoparticle depends on the stage of tumorigenesis
Source: Royal Society of Chemistry journal article supplement (doi:10.1039/d1nr01619a), 2021-01-01
Supplement: d1nr01619a1.pdf [file d1nr01619a1.pdf]

**Supporting Information**

**Passive cancer targeting with a viral nanoparticle depends on the stage of tumorigenesis**

Juan Zhang<sup>a,c</sup>, Wenjing Zhang<sup>a,c</sup>, Mengsi Yang<sup>a,c</sup>, Weiwei Zhu<sup>a,c</sup>, Ming Li<sup>a</sup>, Ao Liang<sup>a,c</sup>, Hui Zhang<sup>a</sup>, Ti Fang<sup>a</sup>, Xian-En Zhang<sup>b,c</sup> and Feng Li<sup>a,c\*</sup>

<sup>a</sup> State Key Laboratory of Virology, Wuhan Institute of Virology, Center for Biosafety Mega-Science, Chinese Academy of Sciences, Wuhan, 430071, China

<sup>b</sup> National Laboratory of Biomacromolecules, CAS Center for Excellence in Biomacromolecules, Institute of Biophysics, Chinese Academy of Sciences, Beijing, 100101, China

<sup>c</sup> University of Chinese Academy of Sciences, Beijing, 100049, China

\*Corresponding author, email: [fli@wh.iov.cn](mailto:fli@wh.iov.cn)

## Supplementary Materials and Methods

### Materials

Ag<sub>2</sub>S QDs coated with polyethylene glycol 10000 (Ag<sub>2</sub>S-10K) were purchased from Suzhou NIR-Optics Technologies Co., Ltd. (China). M-SSA-2000 (PEG2K-NHS) was purchased from JenKem Technology Co., Ltd. (Beijing, China).

### Preparation of Dps-2K<sub>A647</sub>

The recombinant wild-type Dps was expressed and purified according to a previous procedure.<sup>1</sup> Commercial PEG2K-NHS molecules were added to Dps, corresponding to a Dps monomer: PEG molar ratio of 1:1. The mixture was gently shaken at 25°C for 1 h in the dark, and the reaction mixture was stored at 4°C for 8 h. Free PEG2K-NHS molecules were removed by ultrafiltration using a centrifuge tube with 30 kDa molecular weight cut-off membrane. Then A647 stock solution (5 mg/mL) was added at a Dps monomer: A647 molar ratio of 4:1. After reaction for 2 h at room temperature and storage at 4°C for 12 h, free A647 molecules were removed through dialysis against PBS. PEGylated Dps-2K<sub>A647</sub> was concentrated to 3 mg/mL (based on Dps protein) for characterization and *in vivo* injection.

### H&E staining

At 7 days pi of P22-1K<sub>A647</sub> (2 mg/mL, 200  $\mu$ L per mouse), the major organs were collected from the mice after euthanasia and fixed with paraformaldehyde (4%) at 4°C for 24 h. The organs were embedded in paraffin and sliced into 5- $\mu$ m-thick sections. The organ sections were stained by H&E and observed under a panoramic scanner (3DHISTECH, Budapest, Hungary).

### Hematological examination

At 7 days pi of P22-1K<sub>A647</sub> (2 mg/mL, 200  $\mu$ L per mouse), blood (100 $\mu$ L) was collected from the mice after euthanasia and anti-coagulated with EDTA. The blood samples were gently mixed and stored at 4°C before being analyzed by an automated Hematology Analyzer (BC-2800vet) from Shenzhen Mindray Bio-Medical Electronics Co., Ltd, China.

## Supplementary Results and Discussion

To investigate whether the dependence of tumor targeting by P22 VNPs on tumorigenesis stage also holds for other nanoparticle systems, we performed *in vivo* tumor targeting experiments using another two kinds of nanoparticles, namely a protein nanocage called DNA binding protein from starved cells (Dps) of the bacterium *Listeria innocua*<sup>2</sup> and silver sulfide (Ag<sub>2</sub>S) quantum dots (QDs). The Dps protein nanocage has a diameter of 9 nm and was conjugated with polyethylene glycol 2000 and the Alexa Fluor 647 dye (termed Dps-2K<sub>A647</sub>). The Ag<sub>2</sub>S QDs have a diameter of *ca.* 6 nm (inorganic core) and were coated with polyethylene glycol 10000 (termed Ag<sub>2</sub>S-10K). Ag<sub>2</sub>S-10K QDs are characterized by fluorescence emission in the second near-infrared window (NIR-II), which is advantageous to *in vivo* imaging.<sup>3</sup> TEM observation showed that Dps-2K<sub>A647</sub> and Ag<sub>2</sub>S-10K were uniform (Figure S2a). The hydrodynamic diameters (HD) of Dps-2K<sub>A647</sub> and Ag<sub>2</sub>S-10K were measured by DLS to be 12.93 nm and 17.34 nm, respectively; the zeta potentials of Dps-2K<sub>A647</sub> and Ag<sub>2</sub>S-10K were -19.20 mV and -8.21 mV, respectively (Figure S2b).

At 24 h pi in mice with tumor models of different cancer cell inoculation time, the fluorescence intensity of Dps-2K<sub>A647</sub> at the tumor location was negatively correlated with the time of tumor growth for both left and right tumors (Figure S3a). There were significant differences in tumor accumulation of Dps-2K<sub>A647</sub> between the 7-day group and 21-day group for both left and right tumors (Figure S3b). Similar phenomenon was observed for Ag<sub>2</sub>S-10K QDs (Figure S3c and S3d). These results indicate that tumorigenesis stage also affects the tumor targeting efficiency of the tiny Dps protein nanocage and Ag<sub>2</sub>S QDs.

## Supplementary Figures

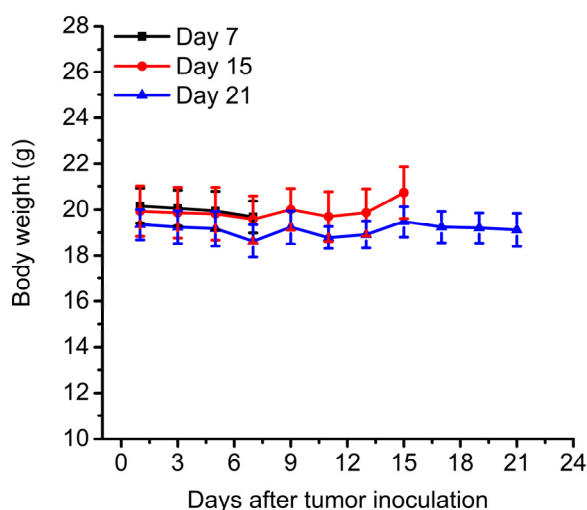

**Figure S1.** Body weight profiles of the mice from the 7-day, 15-day, and 21-day groups after tumor inoculation. Results are presented as the mean  $\pm$  SD (n = 4-5).

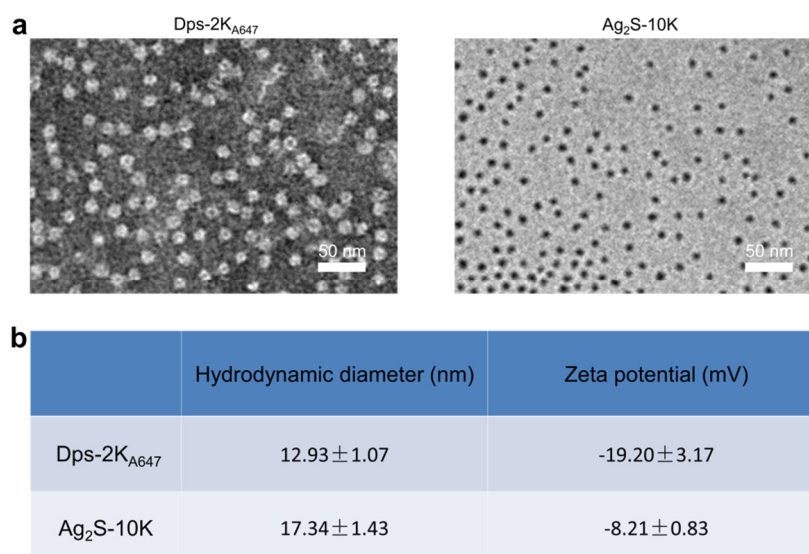

**Figure S2.** Characterization of Dps-2K<sub>A647</sub> and Ag<sub>2</sub>S-10K nanoparticles. (a) TEM images. Scale bars: 50 nm. (b) Measurement of hydrodynamic diameter and zeta potential. Results are presented as the mean  $\pm$  SD (n = 3).

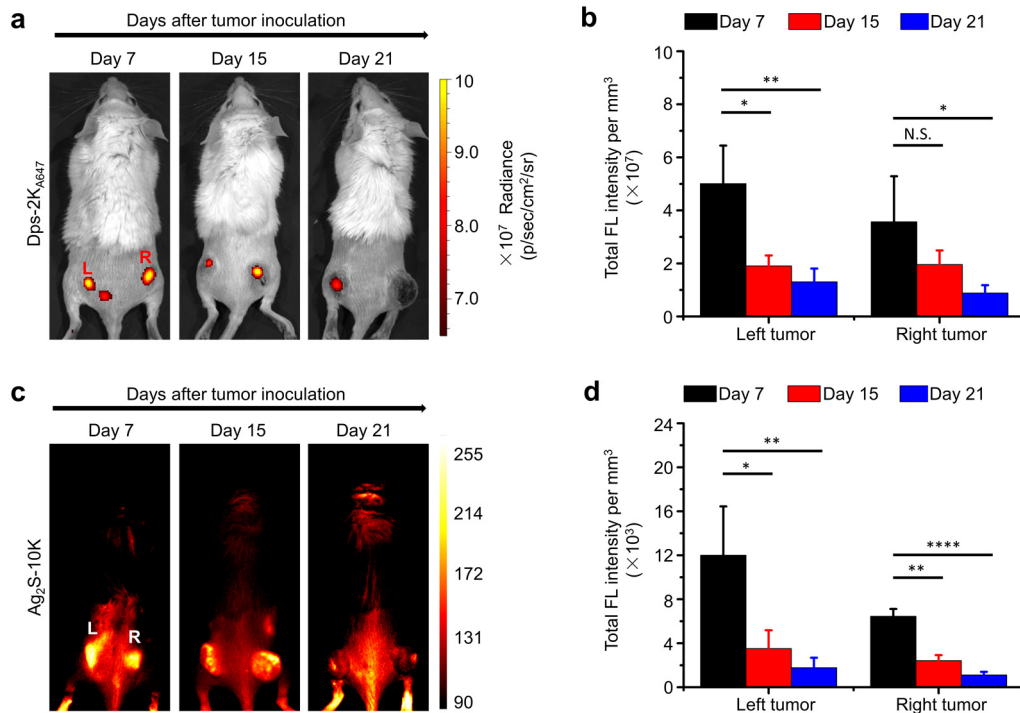

**Figure S3.** *In vivo* evaluation of tumor targeting efficiency after intravenous injection of Dps-2K<sub>A647</sub> or Ag<sub>2</sub>S-10K nanoparticles in mice inoculated with CT26 colorectal cancer cells for 7, 15, or 21 days. (a) *In vivo* fluorescence imaging of Dps-2K<sub>A647</sub>-injected mice. Images were taken at 24 h pi of Dps-2K<sub>A647</sub>. (b) Fluorescence quantification of right and left side tumors from Dps-2K<sub>A647</sub>-injected mice at 24 h pi. (c) *In vivo* fluorescence imaging of Ag<sub>2</sub>S-10K-injected mice. Images were taken at 24 h pi of Ag<sub>2</sub>S-10K. (d) Fluorescence quantification of right and left side tumors from Ag<sub>2</sub>S-10K-injected mice at 24 h pi. Results are presented as the mean  $\pm$  SD (n = 3-5).

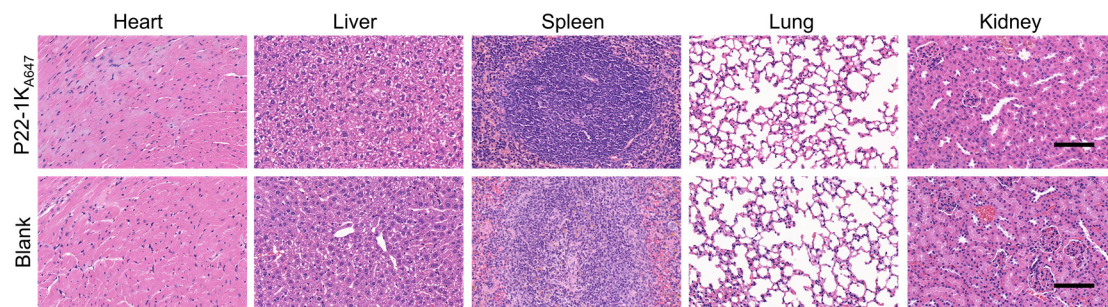

**Figure S4.** Representative images of the major organ sections stained by hematoxylin and eosin (H&E) at 7 days pi of P22-1K<sub>A647</sub>. Scale bars: 100  $\mu$ m.

1 **Table S1.** Blood cell analysis at 7 days pi of P22-1K<sub>A647</sub>. Results are presented as the mean  $\pm$  SD (n =  
2 3).

| Parameters                         | Abbreviation | Mean   | SD     | Unit                | Reference range |
|------------------------------------|--------------|--------|--------|---------------------|-----------------|
| White blood cell counts            | WBC          | 5.93   | 1.76   | 10 <sup>9</sup> /L  | 0.8-6.8         |
| Lymphocytes counts                 | Lymph        | 4.67   | 1.10   | 10 <sup>9</sup> /L  | 0.7-5.7         |
| Monocyte counts                    | Mon          | 0.17   | 0.15   | 10 <sup>9</sup> /L  | 0.0-0.3         |
| Granulocyte counts                 | Gran         | 1.10   | 0.52   | 10 <sup>9</sup> /L  | 0.1-1.8         |
| Lymphocytes Percentage             | Lymph%       | 79.73  | 6.03   | %                   | 55.8-90.6       |
| Monocyte Percentage                | Mon%         | 3.00   | 1.22   | %                   | 1.8-6.0         |
| Granulocyte Percentage             | Gran%        | 17.27  | 4.82   | %                   | 8.6-38.9        |
| Red blood cell                     | RBC          | 8.71   | 1.84   | 10 <sup>12</sup> /L | 6.36-9.42       |
| Hemoglobin                         | HGB          | 143.00 | 38.63  | g/L                 | 110-143         |
| Hematokrit                         | HCT          | 43.53  | 10.34  | %                   | 34.6-44.6       |
| Mean corpuscular volume            | MCV          | 49.90  | 1.87   | fL                  | 48.2-58.3       |
| Mean cell hemoglobin               | MCH          | 16.27  | 0.93   | pg                  | 15.8-19         |
| Mean cell hemoglobin concentration | MCHC         | 326.00 | 14.73  | g/L                 | 302-353         |
| Red blood cell distribution width  | RDW          | 13.53  | 1.50   | %                   | 13-17           |
| Platelet counts                    | PLT          | 543.00 | 270.27 | 10 <sup>9</sup> /L  | 450-1590        |
| Mean platelet volume               | MPV          | 6.10   | 0.61   | fL                  | 3.8-6.0         |

3  
4

## 5 Reference

- 6 1. T. Fang, W. Zhu, C. Li, F. Zhang, D. Gao, Z. P. Zhang, A. Liang, X. E. Zhang and F. Li, *Small*, 2019,  
7 **15**, 1904838.
- 8 2. M. Su, S. Cavallo, S. Stefanini, E. Chiancone and N. D. Chasteen, *Biochemistry*, 2005, **44**,  
9 5572-5578.
- 10 3. G. Hong, J. T. Robinson, Y. Zhang, S. Diao, A. L. Antaris, Q. Wang and H. Dai, *Angew. Chem. Int.*  
11 *Ed.*, 2012, **51**, 9818-9821.  
12
